# Supplementary material
Source: publisher figshare collection journal article supplement (https://acs.figshare.com/ndownloader/files/26712222)
Supplement: Supplementary file 1 [file 26712222]

## Supporting information

# Characterizing Carbon Ring-C<sub>3</sub>N<sub>4</sub> Nanosheets as a Light Harvesting and Charge Carrier Transfer Agent: Photodegradation of Methylene Blue and Photoconversion of CO<sub>2</sub> to CH<sub>4</sub> as Case Studies

Hossein Ashrafi, Morteza Akhond, Maryam Zare, and Ghodratollah Absalan\*,

Professor Massoumi Laboratory, Department of Chemistry, Shiraz University, Shiraz 71454, Iran

\*gubsulun@yahoo.com; absalan@shirazu.ac.ir

## Photocatalytic reduction of CO<sub>2</sub>

Photocatalytic activity of the synthesized catalysts for CO<sub>2</sub> reduction was evaluated in a batch circulation water reactor (Pyrex tubular reactor) with a 300W Xe lamp as the light source. The reactor was double-walled for circulating water between these walls to maintain the solution at around 25°C. An amount of 40 mg photocatalyst powder and 100 mL H<sub>2</sub>O were placed in the reactor. Then, the mixture was stirred under strong magnetic force for 10 min to homogenize the solution. The CO<sub>2</sub> (99.999%) gas was purged into the reactor for 40 min to saturate water with CO<sub>2</sub> and remove the dissolved air. After irradiation, the gas phase products were taken from the reactor in every 1 h by using a 1-mL Hamilton gas tight syringe to analyze it by gas chromatography equipped with flame ionisation detector. The isotope-labeled examination was carry out by gas chromatography-mass spectrometry (GC-MS, 7890A and 5875C, Agilent).

## Electrochemical measurements

Electrochemical measurements were performed by a PGSTAT302N (Metrohm Autolab B.V., Utrecht, The Netherlands). The electrochemical cell was assembled with a conventional three-electrode system. The working electrodes were prepared by using samples coated on FTO glass. A saturated Ag/AgCl (saturated KCl) and a platinum wire were used as reference and auxiliary

electrodes, respectively. The electrolyte was  $\text{Na}_2\text{SO}_4$  solution ( $0.5 \text{ mol L}^{-1}$ ) and the solution was purged with argon for 1h to remove  $\text{O}_2$  before light irradiation. Electrochemical impedance spectroscopy (EIS) was performed using  $5 \text{ mmol L}^{-1}$   $\text{K}_3[\text{Fe}(\text{CN})_6]/\text{K}_4[\text{Fe}(\text{CN})_6]$  solution as the reversible redox probe with  $0.1 \text{ mol L}^{-1}$   $\text{KCl}$  as the electrolyte.

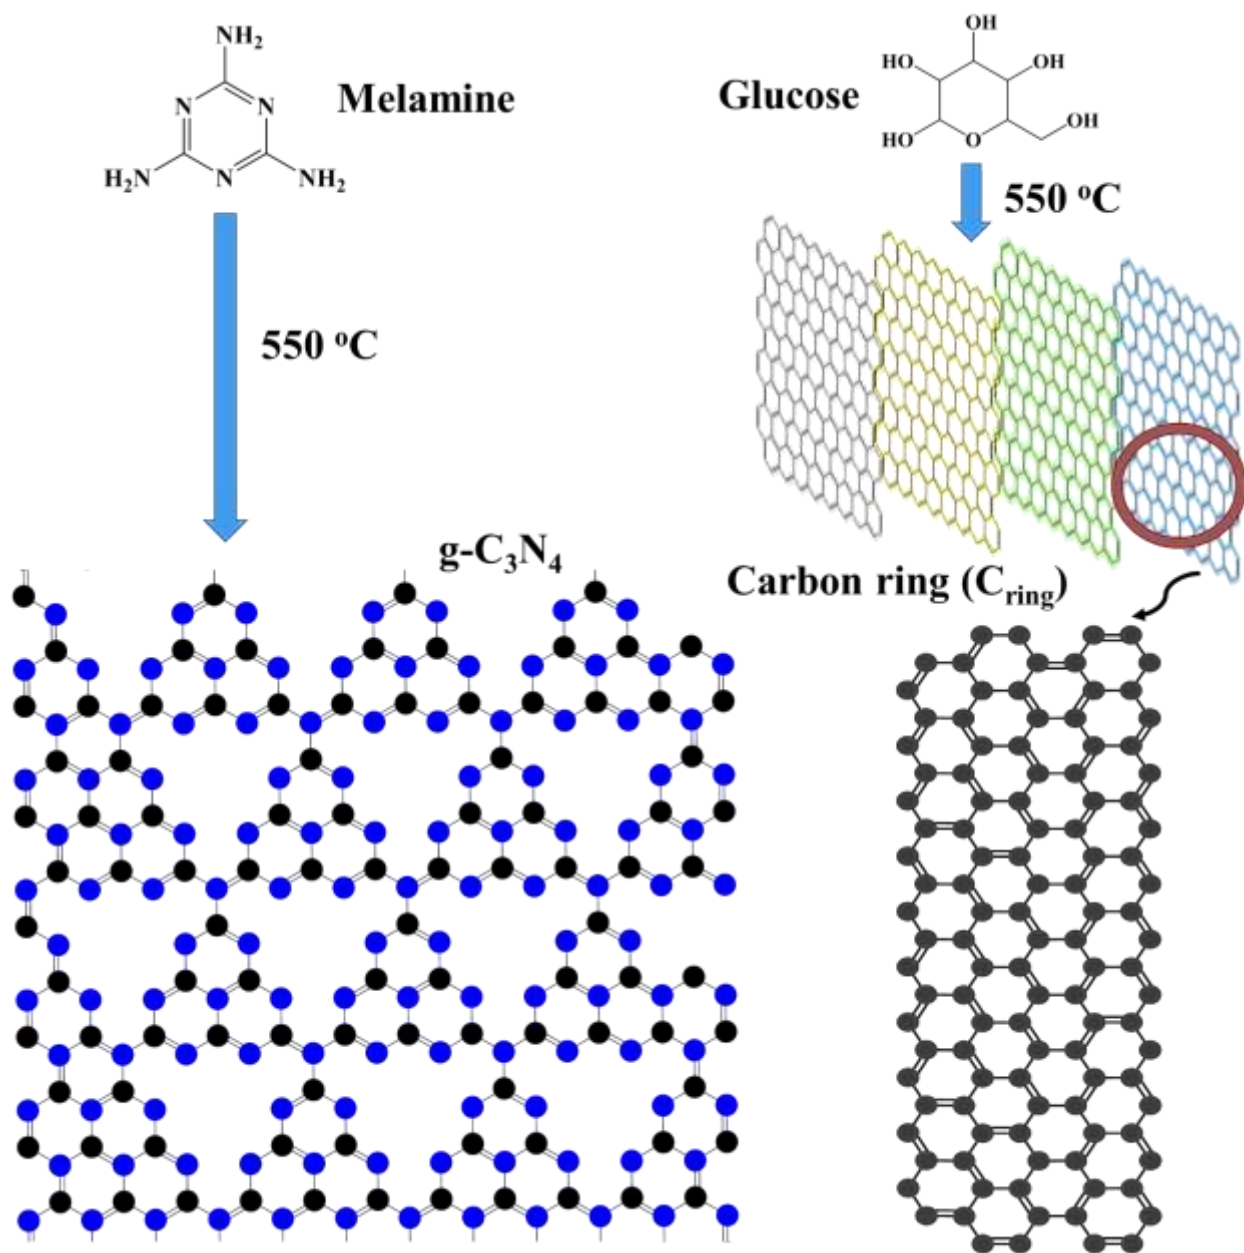

**Figure S1.** When glucose and melamine are heated to high temperatures, carbon and tri-s-triazine rings produce having  $sp^2$  hybrid (two-dimensional domains in-plane with a similar aromatic structure).

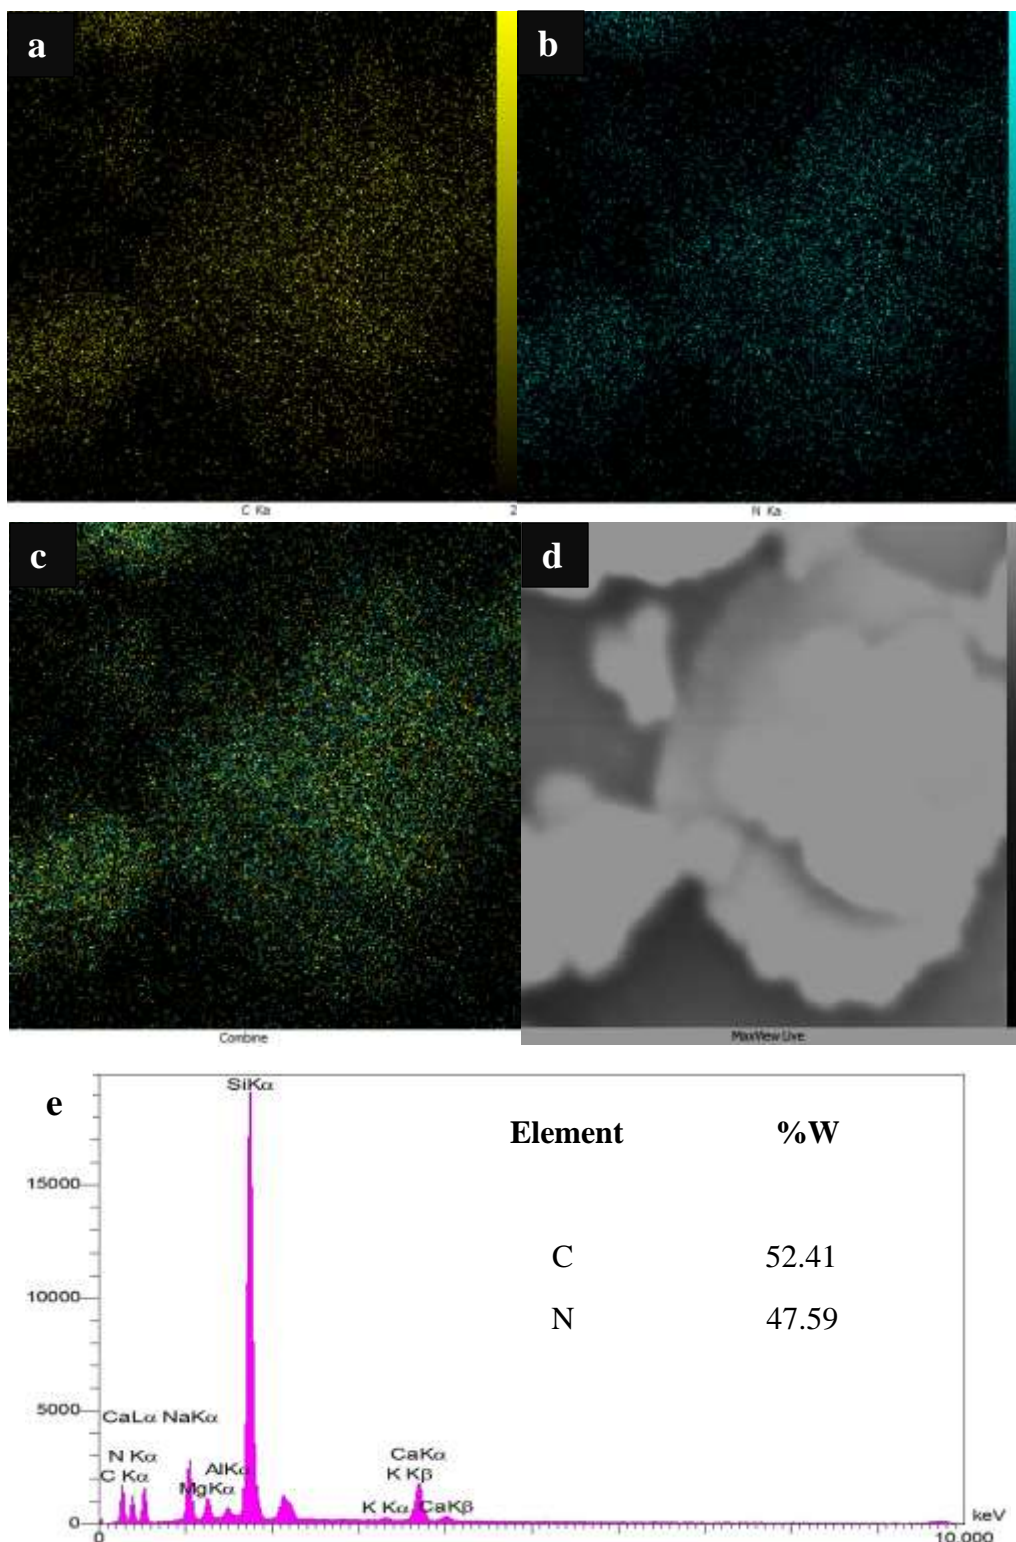

**Figure S2.** The SEM-EDS mapping images and spectra of  $C_{\text{ring}}-C_3N_4$ . (a), the C mapping image; (b), the N mapping image; (c), the combined C and N mapping image; (d), the SEM image shows the corresponding region for mapping; and (e), the EDS spectra of  $C_{\text{ring}}-C_3N_4$ .

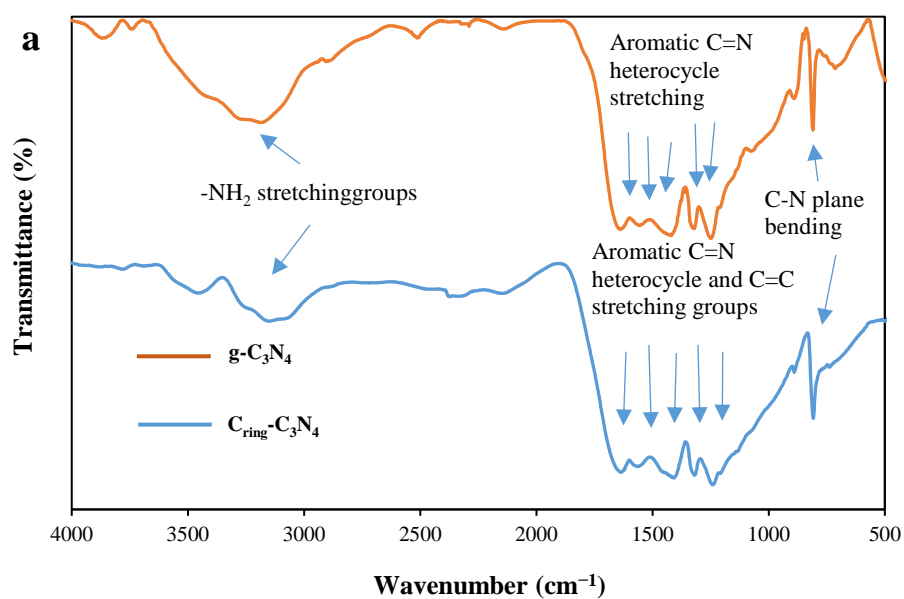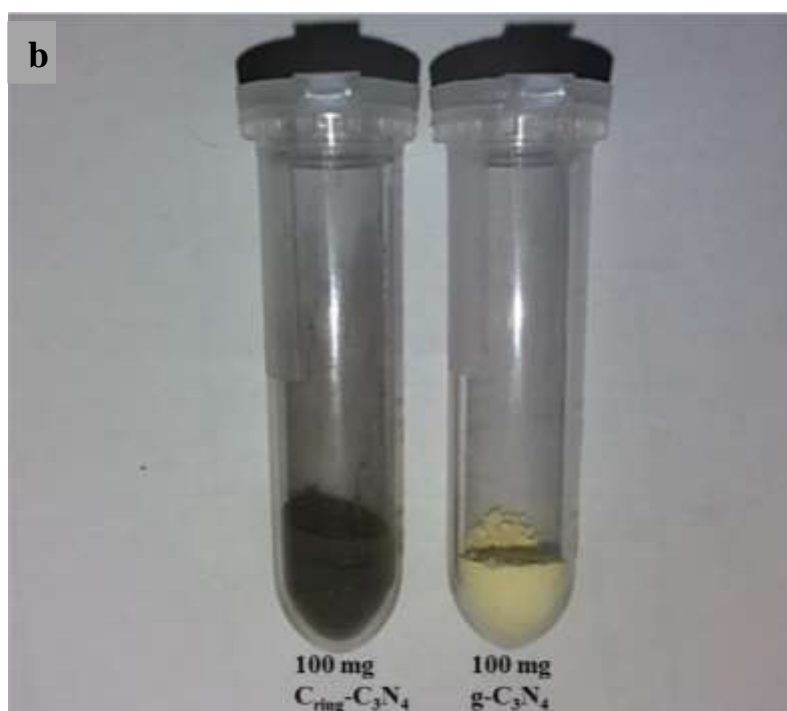

**Figure S3.** (a), the FT-IR spectra of  $\text{C}_{\text{ring}}\text{-C}_3\text{N}_4$  and bulk  $\text{g-C}_3\text{N}_4$ . (b), Comparison between color of  $\text{C}_{\text{ring}}\text{-C}_3\text{N}_4$  and bulk  $\text{g-C}_3\text{N}_4$ .

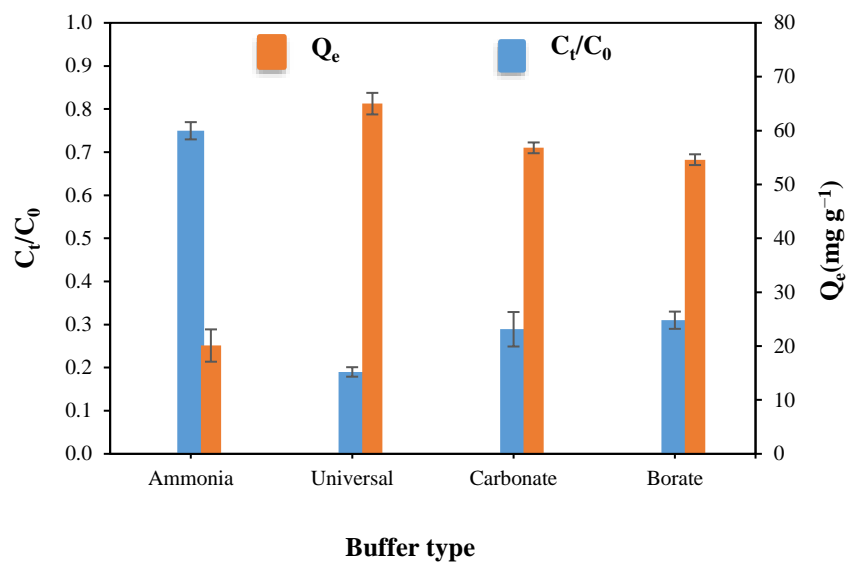

**Figure S4.** Effect of buffer type. Experimental conditions: 40.0 mL of 20.0 mg L<sup>-1</sup> MB, 4.0 mg of C<sub>ring</sub>-C<sub>3</sub>N<sub>4</sub> with 0.01 mol L<sup>-1</sup> universal buffer at pH=11.0.

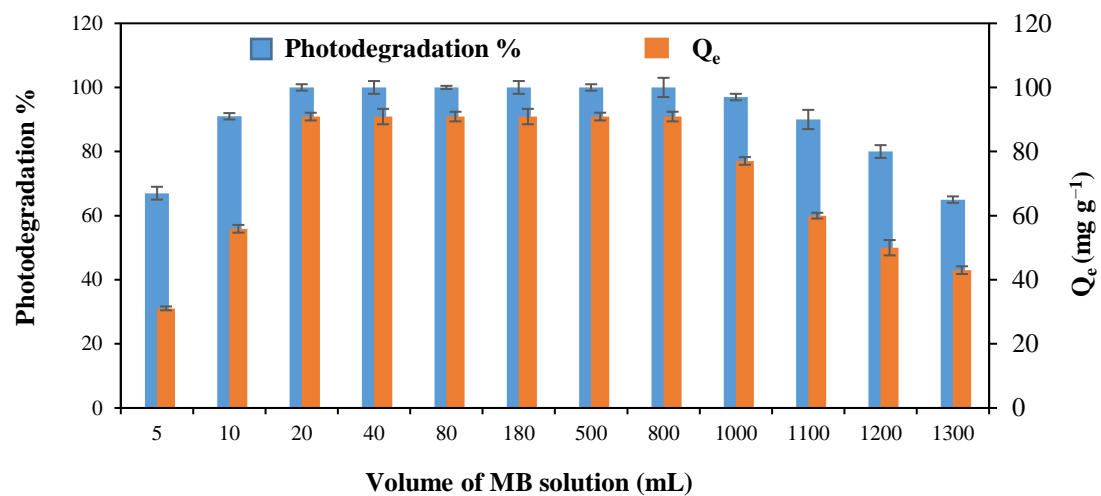

**Figure S5.** Breakthrough volume in adsorption/photodegradation of MB.

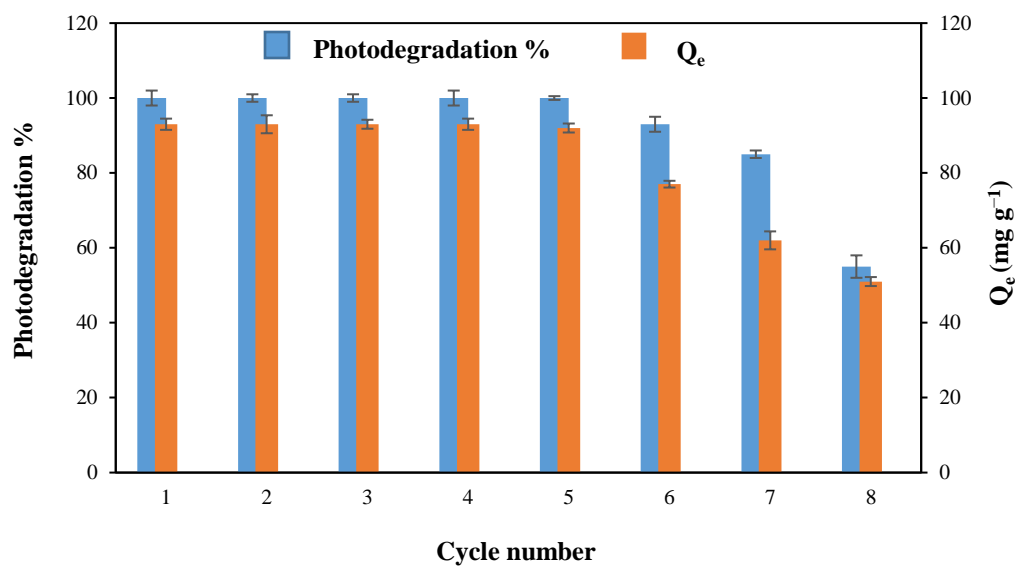

**Figure S6.** Reusability of the photocatalysts in several successive processes in the adsorption/photodegradation of MB.



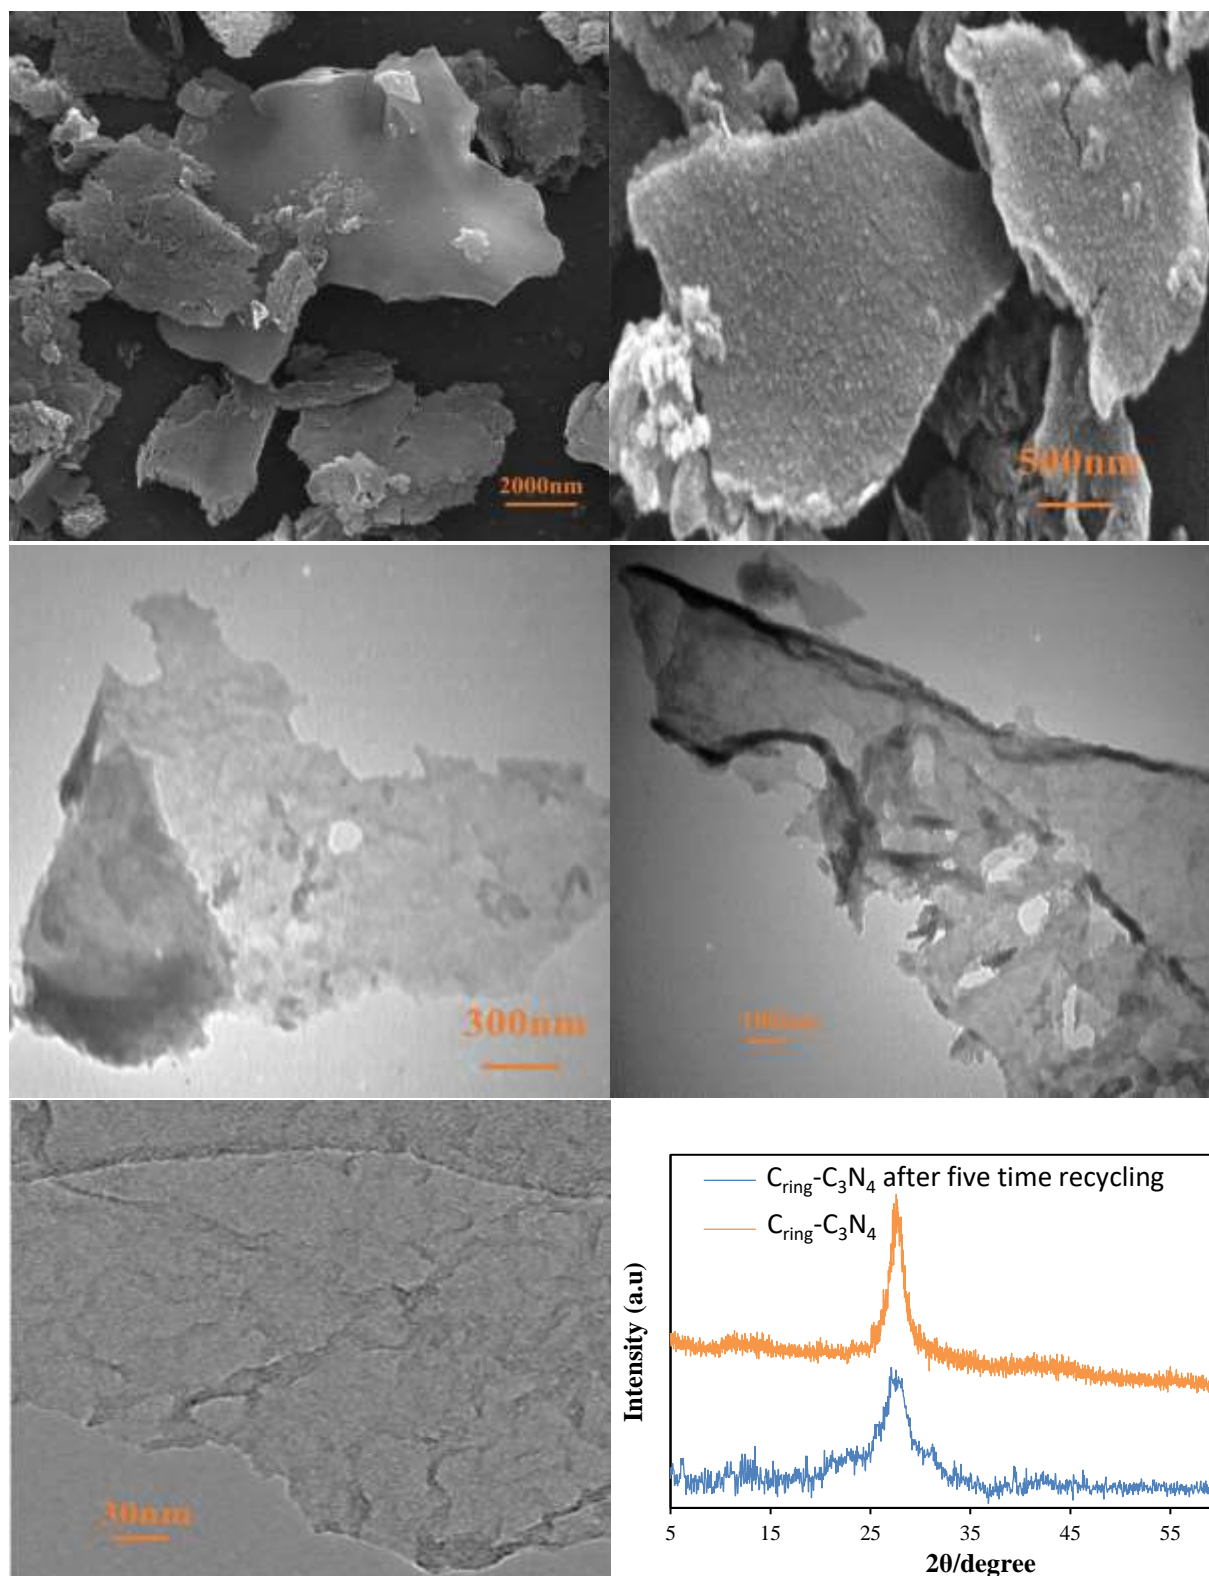

**Figure S7.** SEM, TEM, and XRD analyses after 5-time usage of  $C_{\text{ring}}-C_3N_4$  photocatalyst.

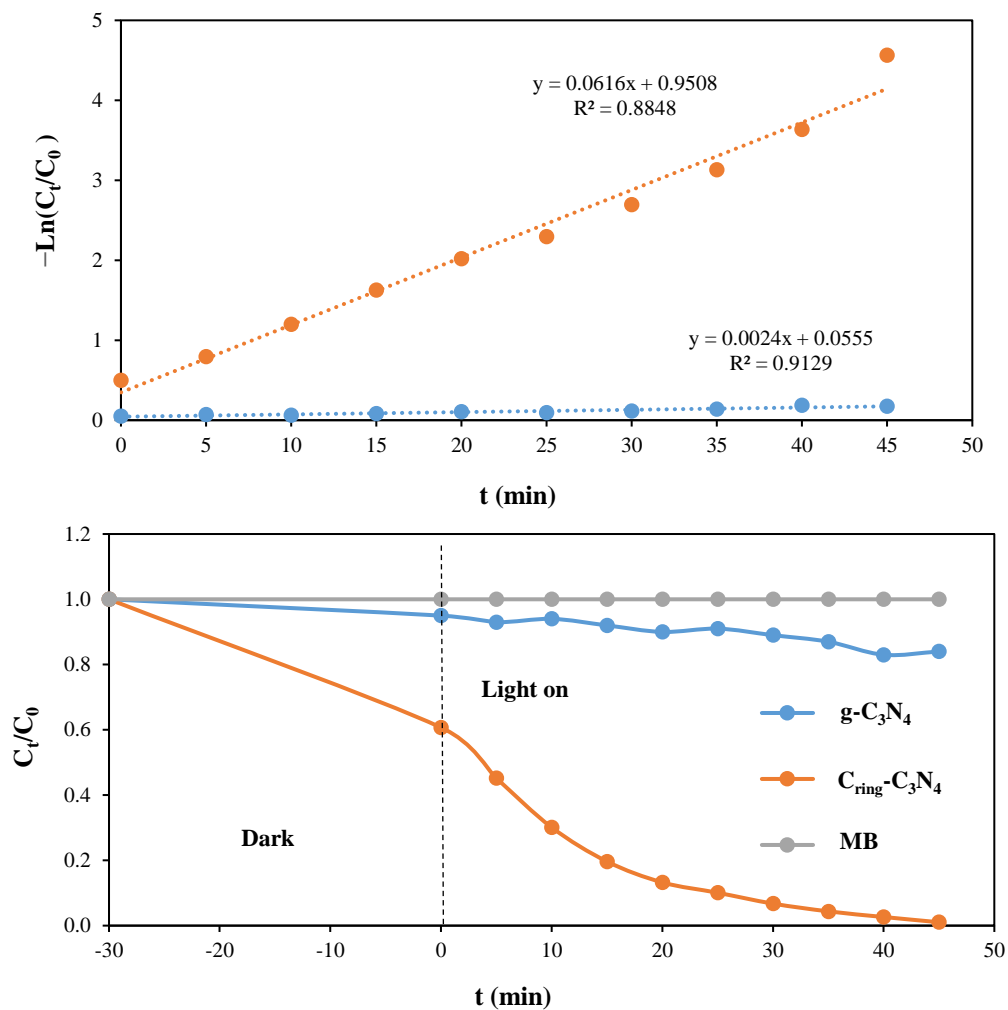

**Figure S8.** The kinetic simulation curves of MB photodegradation under visible light irradiation. Experimental conditions: 4.0 mg  $C_{ring}-C_3N_4$ , 40.0 mL of 20.0 mg  $L^{-1}$  MB with 0.05 M universal buffer at pH=11.0).

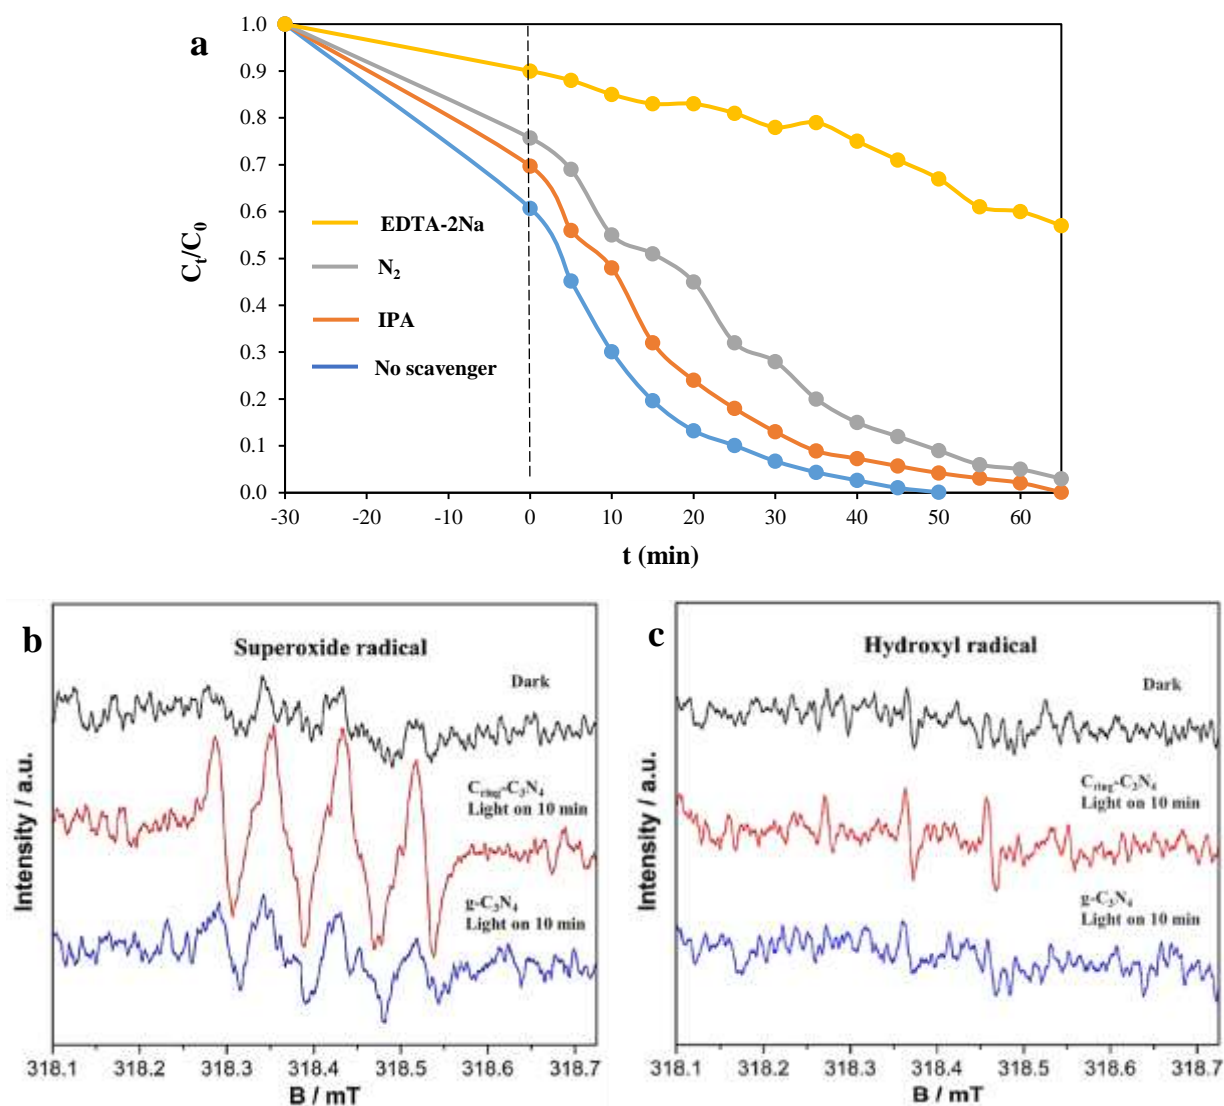

**Figure S9.** (a), MB over  $C_{ring}-C_3N_4$  in the presence of  $Na_2EDTA$ , IPA,  $N_2$  and in the absence of scavengers; (b), ESR spectra of  $DMPO-O_2^{\bullet-}$  for  $C_{ring}-C_3N_4$  and bulk  $g-C_3N_4$ ; (c), ESR spectra of  $DMPO-\bullet OH$  for  $C_{ring}-C_3N_4$  and bulk  $g-C_3N_4$ .

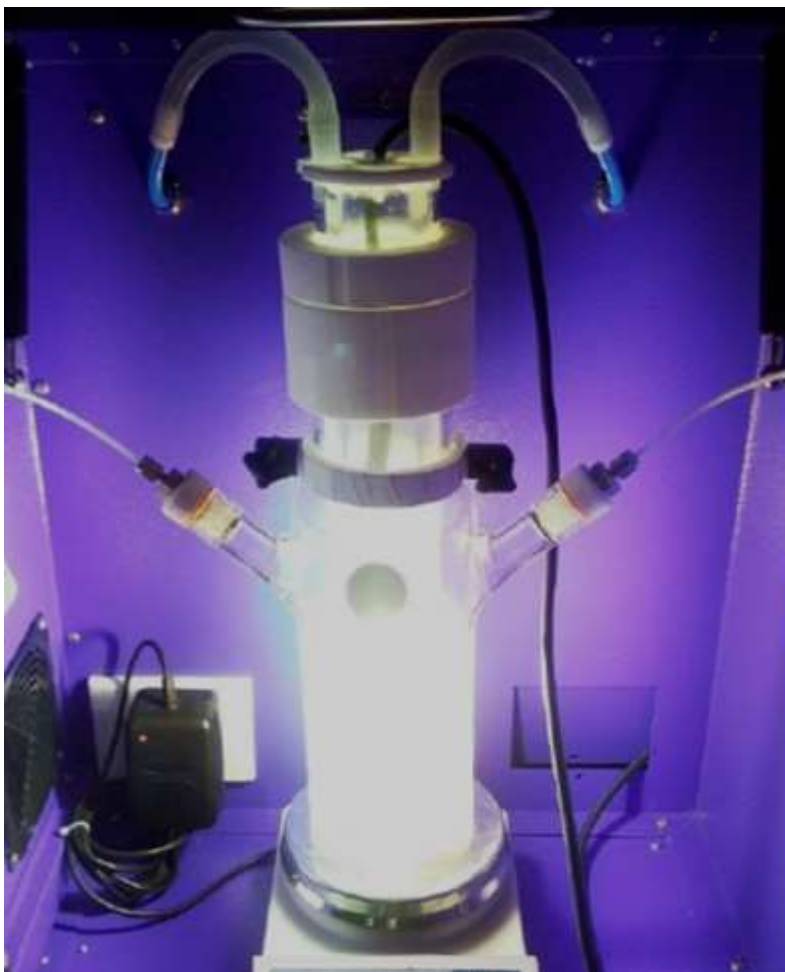

**Figure S10.** Picture of the employed photo-reactor for photoreduction of  $\text{CO}_2$  to  $\text{CH}_4$ .

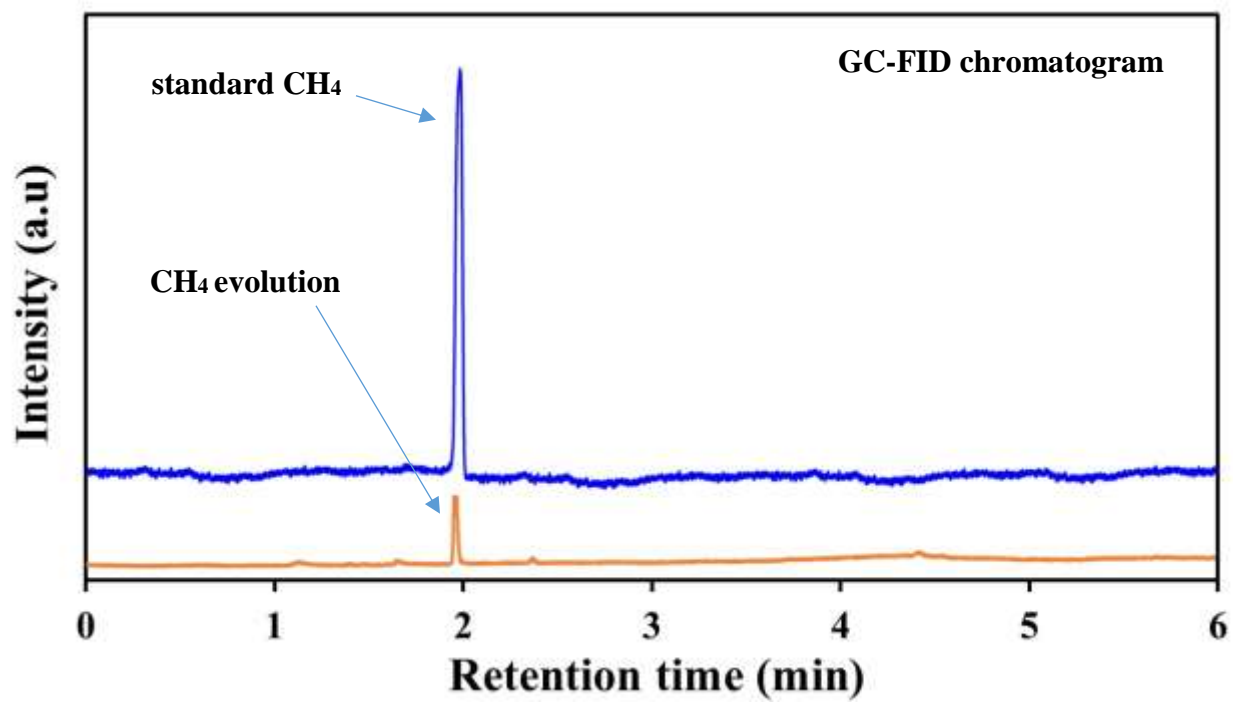

**Figure S11.** The chromatogram of the standard methane sample and the reaction mixture.

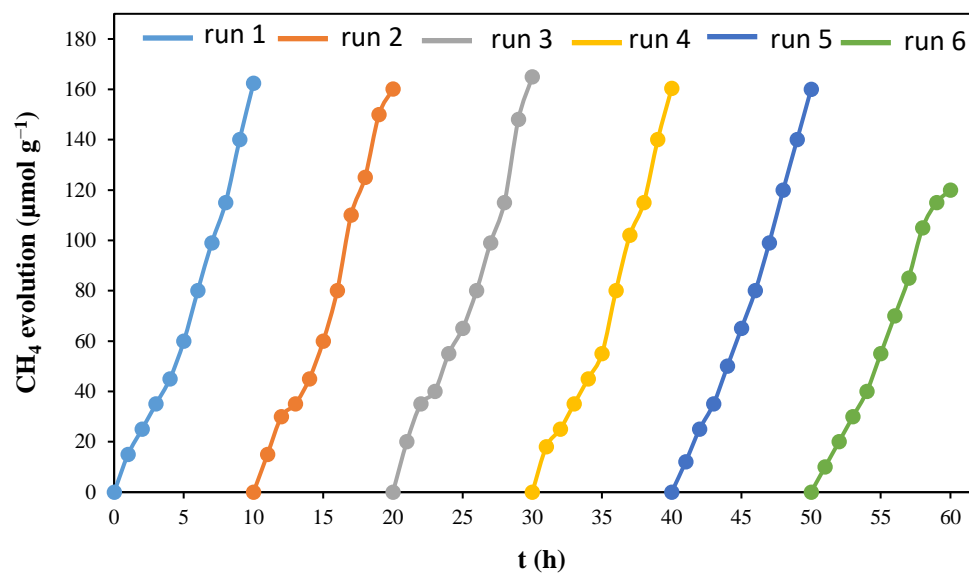

**Figure S12.** Reusability study of  $C_{mg}-C_3N_4$  in the photocatalytic conversion of  $CO_2$  to  $CH_4$ .

### Calculation of AQY:

#### Photocatalytic reaction with Cr<sub>ring</sub>-C<sub>3</sub>N<sub>4</sub> nanosheet photocatalyst from [1]:

Main product: CH<sub>4</sub>

Reactor type: Batch circulation water reactor (pyrex tubular reactor)

Product yield: 162.4 μmol g<sub>cat</sub><sup>-1</sup> after 10 h

Apparent light input (H): 438 mW/cm<sup>2</sup>

Area of irradiation (A): computed from tubular reactor dimensions

(length: 10.0 cm × diameter: 6.0 cm) A = 0.006 m<sup>2</sup>

Band gap: 2.7 eV

The number of reacted electrons is computed by:

$$\text{Number of reacted electrons} = \left[ \frac{\text{mol of product}}{\text{produced in time, t}} \right] * \left[ \frac{\text{Number of electrons required to produce}}{1 \text{ mol of product}} \right] * N_A$$

Since  $\text{CO}_2 + 8\text{H}^+ + 8\text{e}^- \rightarrow \text{CH}_4 + 2\text{H}_2\text{O}$ , it requires 8 electrons to produce 1 mole of CH<sub>4</sub> as the product

$$\text{Number of reacted electrons} = \left[ \frac{162.4 * 10^{-6} \text{ mol}}{10} \frac{\text{mol}}{\text{g h}} \right] * [8] * 6.022 * 10^{23}$$

$$\text{Number of reacted electrons} = 7.82 * 10^{19}$$

The number of incident photons is computed by:

$$\text{Effective number of incident photons} = \left[ \frac{\text{Light absorbed by the photocatalyst}}{\text{Average photon energy}} \right] * t$$

where

$$\text{Light absorbed by the photocatalyst} = H * A = 43.8 \frac{\text{W}}{\text{m}^2} * 0.006 \text{ m}^2 = 0.2628 \text{ W}$$

$$\text{Average photon energy} = \frac{hc}{\lambda}$$

And, λ is the average wavelength of the absorption range of the photocatalyst. The maximum wavelength from the band gap is computed by:

$$\lambda_{\max} = \frac{hc}{E_g} = \frac{(6.626 * 10^{-34} \text{ J.s}) * (3 * 10^8 \text{ m/s})}{2.7 \text{ eV}} * \frac{1 \text{ eV}}{1.6 * 10^{-19} \text{ J}} * 10^9 = 460.1 \text{ nm}$$

Therefore, the average wavelength would be:

$$\lambda = \frac{\lambda_{\min} + \lambda_{\max}}{2} = \frac{250 + 460.1}{2} = 355.05$$

The average photon energy is then computed to be:

$$\text{Average photon energy} = \frac{(6.626 * 10^{-34} \text{ J.s}) * (3 * 10^8 \text{ m/s})}{355.05 * 10^{-9} \text{ m}} = 5.6 * 10^{-19}$$

$$\text{Effective number of incident electrons} = \left[ \frac{0.2628 \text{ W}}{5.6 * 10^{-19} \text{ J}} \frac{3600 \text{ s}}{1 \text{ h}} \right] = 1.689 * 10^{21}$$

AQY calculation:

$$\text{AQY (\%)} = \left[ \frac{\text{number of reacted electrons}}{\text{Effective number of incident electrons}} \right] * 100$$

$$\text{AQY (\%)} = \left[ \frac{7.82 * 10^{19}}{1.689 * 10^{21}} \right] * 100 = 4.63 \%$$

### **Photocatalytic reaction with bulk g-C<sub>3</sub>N<sub>4</sub> photocatalyst:**

Reactor type: Batch circulation water reactor (pyrex tubular reactor)

Product yield: 6.875  $\mu\text{mol g}_{\text{cat}}^{-1}$  after 10 h

Apparent light input (H): 438 mW/cm<sup>2</sup>

Area of irradiation (A): computed from tubular reactor dimensions

(length: 10.0 cm  $\times$  diameter: 6.0 cm) A = 0.006 m<sup>2</sup>

Band gap: 2.7 eV

The number of reacted electrons is computed by:



$$\text{Number of reacted electrons} = \left[ \frac{\text{mol of product}}{\text{produced in time, t}} \right] * \left[ \frac{\text{Number of electrons required to produce}}{1 \text{ mol of product}} \right] * N_A$$

Since  $\text{CO}_2 + 8\text{H}^+ + 8\text{e}^- \rightarrow \text{CH}_4 + 2\text{H}_2\text{O}$ , it requires 8 electrons to produce 1 mole of  $\text{CH}_4$

$$\text{Number of reacted electrons} = \left[ \frac{6.875 * 10^{-6} \text{ mol}}{10} \frac{\text{mol}}{\text{g h}} \right] * [8] * 6.022 * 10^{23}$$

$$\text{Number of reacted electrons} = 3.3121 * 10^{18}$$

The number of incident photons is computed by:

$$\text{Effective number of incident photons} = \left[ \frac{\text{Light absorbed by the photocatalyst}}{\text{Average photon energy}} \right] * t$$

Wherein light absorbed by the photocatalyst and average photon energy is found to be:

$$\text{Light absorbed by the photocatalyst} = H * A = 43.8 \frac{\text{W}}{\text{m}^2} * 0.006 \text{ m}^2 = 0.2628 \text{ W}$$

$$\text{Average photon energy} = \frac{hc}{\lambda}$$

where  $\lambda$  is the average wavelength of the absorption range of the photocatalyst. The maximum wavelength from the band gap was computed by:

$$\lambda_{\max} = \frac{hc}{E_g} = \frac{(6.626 * 10^{-34} \text{ J.s}) * (3 * 10^8 \text{ m/s})}{2.7 \text{ eV}} * \frac{1 \text{ eV}}{1.6 * 10^{-19} \text{ J}} * 10^9 = 460.1 \text{ nm}$$

Therefore, the average wavelength would be

$$\lambda = \frac{\lambda_{\min} + \lambda_{\max}}{2} = \frac{250 + 460.1}{2} = 355.05$$

The average photon energy is then computed to be

$$\text{Average photon energy} = \frac{(6.626 * 10^{-34} \text{ j.s}) * (3 * 10^8 \text{ m/s})}{355.05 * 10^{-9} \text{ m}} = 5.6 * 10^{-19}$$

$$\text{Effective number of incident electrons} = \left[ \frac{0.2628 \text{ W}}{5.6 * 10^{-19} \text{ j}} \frac{3600 \text{ s}}{1 \text{ h}} \right] = 1.689 * 10^{21}$$

AQY calculation:

$$\text{AQY (\%)} = \left[ \frac{\text{number of reacted electrons}}{\text{Effective number of incident electrons}} \right] * 100$$

$$\text{AQY (\%)} = \left[ \frac{3.3121 * 10^{18}}{1.689 * 10^{21}} \right] * 100 = 0.1961 \%$$

$$\left[ \frac{\text{AQY (\%)} C_{\text{ring}} - C_3N_4}{\text{AQY (\%)} g - C_3N_4} \right] = \left[ \frac{4.63}{0.1961} \right] = 23.61$$

**Table S1.** Linear and nonlinear equations of absorption isotherms.

| Name of models isotherm                 | Equations                                                                                                                            | Plots for isotherms           |
|-----------------------------------------|--------------------------------------------------------------------------------------------------------------------------------------|-------------------------------|
| <b>Linear adsorption isotherms</b>      |                                                                                                                                      |                               |
| Langmuir model <sup>1</sup>             | $\frac{C_e}{Q_e} = \frac{1}{Q_m} C_e + \frac{1}{k_L Q_m}$                                                                            | $\frac{C_e}{Q_e}$ vs. $C_e$   |
| Freundlich model <sup>2</sup>           | $\ln q_e = \ln k_f + \frac{1}{n} \ln C_e$                                                                                            | $\ln Q_e$ vs. $\ln C_e$       |
| Temkin model <sup>3</sup>               | $Q_e = \left(\frac{RT}{b}\right) \ln k_T + \left(\frac{RT}{b}\right) \ln C_e$<br>$B_T = \frac{RT}{b}$                                | $Q_e$ vs. $\ln C_e$           |
| Dubinin-radushkevich model <sup>3</sup> | $\ln Q_e = \ln Q_m - \beta \varepsilon^2$<br>$E = \frac{1}{\sqrt{-2\beta}}$<br>$\varepsilon = RT \ln \left(1 + \frac{1}{C_e}\right)$ | $\ln Q_e$ vs. $\varepsilon^2$ |
| <b>Nonlinear adsorption isotherms</b>   |                                                                                                                                      |                               |
| Langmuir model <sup>1</sup>             | $Q_e = Q_m k_L \frac{C_e}{1 + k_L C_e}$                                                                                              | $Q_e$ vs. $C_e$               |
| Freundlich model <sup>2</sup>           | $Q_e = k_f C_e^{\frac{1}{n}}$                                                                                                        | $Q_e$ vs. $C_e$               |
| Temkin model <sup>3</sup>               | $Q_e = \frac{RT}{b} (\ln k_T C_e)$<br>$B_T = \frac{RT}{b}$                                                                           | $Q_e$ vs. $C_e$               |
| Dubinin-radushkevich model <sup>3</sup> | $Q_e = q_m e^{-\beta \varepsilon^2}$                                                                                                 | $Q_e$ vs. $C_e$               |

**Table S2.** Linear and nonlinear equations of kinetic isotherms.

| Name of models isotherm                    | Equations                                                         | Plots for isotherms         |
|--------------------------------------------|-------------------------------------------------------------------|-----------------------------|
| <b>linear kinetic isotherms</b>            |                                                                   |                             |
| Pseudo-first-order model <sup>4</sup>      | $\ln (Q_e - Q_t) = \ln Q_e - tk_1$                                | $\ln (Q_e - Q_t)$ vs. $t$   |
| Pseudo-second-order model <sup>5</sup>     | $\frac{t}{Q_t} = \frac{1}{k_2 Q_e^2} + \frac{t}{Q_e}$             | $\frac{t}{Q_t}$ vs. $t$     |
| Elovich model <sup>6</sup>                 | $Q_t = \frac{1}{\beta} \ln (\alpha\beta) + \frac{1}{\beta} \ln t$ | $Q_t$ vs. $\ln t$           |
| Intraparticle diffusion model <sup>7</sup> | $Q_t = k_{id}t^{\frac{1}{2}} + k_0$                               | $Q_t$ vs. $t^{\frac{1}{2}}$ |
| <b>Nonlinear kinetic isotherms</b>         |                                                                   |                             |
| Pseudo-first-order model <sup>4</sup>      | $Q_t = Q_e(1 - \exp - kt)$                                        | $Q_t$ vs. $t$               |
| Pseudo-second-order model <sup>5</sup>     | $Q_t = \frac{k_2 Q_e^2 t}{1 + k_2 Q_e t}$                         | $Q_t$ vs. $t$               |
| Elovich model <sup>6</sup>                 | $Q_t = \beta \ln (\alpha\beta t)$                                 | $Q_t$ vs. $t$               |
| Intraparticle diffusion model <sup>7</sup> | $Q_t = k_{id}t^{\frac{1}{2}} + k_0$                               | $Q_t$ vs. $t$               |

**Table S3.** Anova and Akaike information criterion tests for linear kinetic and adsorption isotherms.

| <b>Adsorption isotherm</b> | <b>Sum Sq</b>        | <b>Sum Sq Error</b>  | <b>Mean Sq</b>       | <b>Mean Sq Error</b>  | <b>F</b> | <b>P<sub>value</sub></b> | <b>ACI</b> |
|----------------------------|----------------------|----------------------|----------------------|-----------------------|----------|--------------------------|------------|
| Langmuir                   | $6.9 \times 10^{-2}$ | $5.3 \times 10^{-4}$ | $6.9 \times 10^{-2}$ | $8.89 \times 10^{-5}$ | 783.24   | $1.4 \times 10^{-7}$     | -22.1812   |
| Freundlich                 | 1.35                 | $5.3 \times 10^{-2}$ | 1.35                 | $8.98 \times 10^{-3}$ | 152.23   | $1.7 \times 10^{-5}$     | -6.1914    |
| Temkin                     | 5309.6               | 690.11               | 5309.6               | 115.02                | 46.16    | $4.9 \times 10^{-4}$     | 26.7114    |
| Dubinin-radushkevich       | 1.03                 | 0.37                 | 1.03                 | $6.3 \times 10^{-2}$  | 16.45    | $6.7 \times 10^{-3}$     | 0.593      |
| <b>Kinetics modeling</b>   |                      |                      |                      |                       |          |                          |            |
| Pseudo first order         | 9.42                 | $8.9 \times 10^{-2}$ | 9.42                 | $1.3 \times 10^{-2}$  | 738.91   | $2.3 \times 10^{-8}$     | -5.447     |
| Pseudo second order        | 0.31                 | $3.8 \times 10^{-2}$ | $3.1 \times 10^{-1}$ | $5.5 \times 10^{-3}$  | 56.32    | $1.4 \times 10^{-4}$     | -8.7281    |
| Elovich                    | 12295                | 259.14               | 12295                | 37.02                 | 332.11   | $3.7 \times 10^{-7}$     | 25.7218    |
| Intraparticle diffusion    | 5666.7               | 333.08               | 5666.7               | 55.51                 | 102.08   | $5.5 \times 10^{-5}$     | 26.8826    |

**Table S4.** A comparison between the various photocatalysts for photoreduction of CO<sub>2</sub> to CH<sub>4</sub>.

| Photocatalyst                                                               | CH <sub>4</sub> Yield<br>( $\mu\text{mol/g h}$ ) | Light<br>input<br>(W/m <sup>2</sup> ) | Area of<br>irradiation<br>(m <sup>2</sup> ) | Band<br>gap<br>(eV) | Wavelength<br>(nm)     |                        | Ave.<br>$\lambda$<br>(nm) | No. of<br>reacted<br>electrons | Average<br>photon<br>energy (J) | No. of<br>incident<br>photons | AQY<br>(%) |
|-----------------------------------------------------------------------------|--------------------------------------------------|---------------------------------------|---------------------------------------------|---------------------|------------------------|------------------------|---------------------------|--------------------------------|---------------------------------|-------------------------------|------------|
|                                                                             |                                                  |                                       |                                             |                     | $\lambda_{\text{min}}$ | $\lambda_{\text{max}}$ |                           |                                |                                 |                               |            |
| Pt-XG/RBT <sup>8</sup>                                                      | 37                                               | 1000                                  | 0.00049                                     | 2.41                | 250                    | 515.5                  | 383                       | $1.78 \times 10^{20}$          | $5.19 \times 10^{-19}$          | $3.4 \times 10^{21}$          | 5.2479     |
| C <sub>3</sub> N-TNT06 <sup>9</sup>                                         | 9.75                                             | 1000                                  | 0.00071                                     | 2.8                 | 250                    | 443.7                  | 347                       | $4.7 \times 10^{19}$           | $5.73 \times 10^{-19}$          | $4.46 \times 10^{21}$         | 1.0532     |
| In <sub>2</sub> O <sub>3</sub> -C <sub>3</sub> N <sub>4</sub> <sup>10</sup> | 7.991                                            | 12000                                 | 0.00063                                     | 2.8                 | 250                    | 444                    | 347                       | $3.85 \times 10^{19}$          | $5.73 \times 10^{-19}$          | $4.71 \times 10^{21}$         | 0.082      |
| CZTS-ZnO <sup>11</sup>                                                      | 0.095                                            | 1000                                  | 0.00041                                     | 1.74                | 250                    | 714                    | 482                       | $4.58 \times 10^{17}$          | $4.12 \times 10^{-19}$          | $3.58 \times 10^{21}$         | 0.0128     |
| HCP-TiO <sub>2</sub> -FG <sup>12</sup>                                      | 27.62                                            | 4330                                  | 0.00031                                     | 2.34                | 420                    | 531                    | 475                       | $1.33 \times 10^{20}$          | $4.18 \times 10^{-19}$          | $1.17 \times 10^{22}$         | 1.14       |
| Pd <sub>x</sub> Cu <sub>1</sub> -TiO <sub>2</sub> <sup>13</sup>             | 19.6                                             | 20                                    | 0.0064                                      | -                   | 250                    | 400                    | 325                       | $9.44 \times 10^{19}$          | $6.12 \times 10^{-19}$          | $7.53 \times 10^{20}$         | 12.53      |
| Pt-X-RT <sup>14</sup>                                                       | 1.13                                             | 1000                                  | 0.00071                                     | 2.85                | 250                    | 435.9                  | 343                       | $5.44 \times 10^{18}$          | $5.8 \times 10^{-19}$           | $4.41 \times 10^{21}$         | 0.1234     |
| Pt/TiO <sub>2</sub> <sup>15</sup>                                           | 2.85                                             | 348                                   | 0.0084                                      | 3.18                | 250                    | 391                    | 320                       | $1.37 \times 10^{19}$          | $6.21 \times 10^{-19}$          | $1.69 \times 10^{22}$         | 0.081      |
| Cu <sub>x</sub> O-TiO <sub>2</sub> <sup>16</sup>                            | 0.152                                            | 1000                                  | 0.00071                                     | 3.15                | 250                    | 394.4                  | 322                       | $7.32 \times 10^{17}$          | $6.17 \times 10^{-19}$          | $4.14 \times 10^{21}$         | 0.0177     |
| C <sub>ring</sub> -C <sub>3</sub> N <sub>4</sub><br>In this work            | 16.24                                            | 43.8                                  | 0.006                                       | 2.7                 | 250                    | 460.1                  | 355.05                    | $7.82 \times 10^{19}$          | $5.6 \times 10^{-19}$           | $1.689 \times 10^{21}$        | 4.63       |

**Table S5.** The comparison of the synthesized photocatalyst with some literature-reported photocatalysts in term of their ability for degradation of Methylene blue.

| <b>Photocatalyst</b>                                            | <b>W<sub>Catalyst</sub><br/>(g)</b> | <b>Volume and<br/>concentration<br/>of MB</b> | <b>Irradiation<br/>Time<br/>(h)</b> | <b>mg MB/W<sub>Catalyst</sub></b> | <b>Degradation<br/>efficiency<sup>a</sup></b> | <b>Reference</b> |
|-----------------------------------------------------------------|-------------------------------------|-----------------------------------------------|-------------------------------------|-----------------------------------|-----------------------------------------------|------------------|
| <b>Nanoporous<br/>Graphitic<br/>Carbon Nitride</b>              | 0.025                               | 50 mL<br>10 mg/L                              | 3                                   | 20                                | 0.11                                          | 17               |
| <b>TiO<sub>2</sub> nano-sized<br/>particles</b>                 | 1                                   | 600 mL<br>20 mg/L                             | 9                                   | 12                                | 0.02                                          | 18               |
| <b>TiO<sub>2</sub>/ZnO</b>                                      | 0.3                                 | 10 mL<br>10 mg/L                              | 5                                   | 0.3                               | 0.001                                         | 19               |
| <b>Al<sub>2</sub>O<sub>3</sub>/Fe<sub>2</sub>O<sub>3</sub></b>  | 0.2                                 | 100 mL<br>25 mg/L                             | 1.5                                 | 12.5                              | 0.14                                          | 20               |
| <b>Fe<sub>3</sub>O<sub>4</sub>@rGO@<br/>TiO<sub>2</sub></b>     | 0.05                                | 50 mL<br>10 mg/L                              | 2                                   | 10                                | 0.08                                          | 21               |
| <b>TiO<sub>2</sub>/polyacryl<br/>amide</b>                      | 0.025                               | 25 mL<br>10 mg/L                              | 5                                   | 10                                | 0.03                                          | 22               |
| <b>SnO<sub>2</sub>/S-doped<br/>g-C<sub>3</sub>N<sub>4</sub></b> | 0.14                                | 500 mL<br>6 mg/L                              | 2.5                                 | 21.4                              | 0.14                                          | 23               |
| <b>Ag/g-C<sub>3</sub>N<sub>4</sub></b>                          | 0.1                                 | 300 mL<br>10 mg/L                             | 1                                   | 30                                | 0.5                                           | 24               |
| <b>C<sub>3</sub>N<sub>4</sub>/ZnO</b>                           | 0.15                                | 150 mL<br>3.2 mg/L                            | 2                                   | 3.2                               | 0.03                                          | 25               |
| <b>npg-C<sub>3</sub>N<sub>4</sub></b>                           | 0.001                               | 20 mL<br>20 mg/L                              | 0.75                                | 400                               | 8.9                                           | 26               |
| <b>C<sub>ring</sub>-C<sub>3</sub>N<sub>4</sub></b>              | 0.004                               | 40 mL<br>20 mg/L                              | 0.75                                | 200                               | 4.4                                           | This work        |

<sup>a</sup>Degradation efficiency was defined as (mg MB/W<sub>Catalyst</sub>) per minute of the irradiation time in this table.

## References

- (1) Hallajiqomi, M.; Eisazadeh, H., Adsorption of manganese ion using polyaniline and it's nanocomposite: Kinetics and isotherm studies. *J. Ind. Eng. Chem.* **2017**, 55, 191-197.
- (2) Araújo, C. S.; Almeida, I. L.; Rezende, H. C.; Marcionilio, S. M.; Léon, J. J.; de Matos, T. N., Elucidation of mechanism involved in adsorption of Pb (II) onto lobeira fruit (*Solanum lycocarpum*) using Langmuir, Freundlich and Temkin isotherms. *Microchem. J.* **2018**, 137, 348-354.
- (3) Dada, A.; Olalekan, A.; Olatunya, A.; Dada, O., Langmuir, Freundlich, Temkin and Dubinin–Radushkevich isotherms studies of equilibrium sorption of  $\text{Zn}^{2+}$  unto phosphoric acid modified rice husk. *IOSR-JAC.* **2012**, 3, 38-45.
- (4) Badawi, M.; Negm, N.; Abou Kana, M.; Hefni, H.; Moneem, M. A., Adsorption of aluminum and lead from wastewater by chitosan-tannic acid modified biopolymers: isotherms, kinetics, thermodynamics and process mechanism. *Int. J. Biol. Macromol.* **2017**, 99, 465-476.
- (5) Tan, K.; Hameed, B., Insight into the adsorption kinetics models for the removal of contaminants from aqueous solutions. *J. Taiwan Inst. Chem. Eng.* **2017**, 74, 25-48.
- (6) Cheung, C. W.; Porter, J. F.; McKay, G., Elovich equation and modified second-order equation for sorption of cadmium ions onto bone char. *J. Chem. Technol. Biotechnol.* **2000**, 75, 963-970.
- (7) Aljeboree, A. M.; Alkaim, A. F.; Al-Dujaili, A. H., Adsorption isotherm, kinetic modeling and thermodynamics of crystal violet dye on coconut husk-based activated carbon. *Desalin Water Treat.* **2015**, 53, 3656-3667.
- (8) Sorcar, S.; Thompson, J.; Hwang, Y.; Park, Y. H.; Majima, T.; Grimes, C. A.; Durrant, J. R.; In, S.-I., High-rate solar-light photoconversion of  $\text{CO}_2$  to fuel: controllable transformation from C1 to C2 products. *Energy Environ. Sci.* **2018**, 11, 3183-3193.
- (9) Parayil, S. K.; Razzaq, A.; Park, S.-M.; Kim, H. R.; Grimes, C. A.; In, S.-I., Photocatalytic conversion of  $\text{CO}_2$  to hydrocarbon fuel using carbon and nitrogen co-doped sodium titanate nanotubes. *Appl. Catal., A.* **2015**, 498, 205-213.
- (10) Cao, S.-W.; Liu, X.-F.; Yuan, Y.-P.; Zhang, Z.-Y.; Liao, Y.-S.; Fang, J.; Loo, S. C. J.; Sum, T. C.; Xue, C., Solar-to-fuels conversion over  $\text{In}_2\text{O}_3/\text{g-C}_3\text{N}_4$  hybrid photocatalysts. *Appl. Catal., B.* **2014**, 147, 940-946.



- (11) Zubair, M.; Razzaq, A.; Grimes, C. A.; In, S.-I., Cu<sub>2</sub>ZnSnS<sub>4</sub> (CZTS)-ZnO: A noble metal-free hybrid Z-scheme photocatalyst for enhanced solar-spectrum photocatalytic conversion of CO<sub>2</sub> to CH<sub>4</sub>. *J. CO<sub>2</sub> Util.* **2017**, 20, 301-311.
- (12) Wang, S.; Xu, M.; Peng, T.; Zhang, C.; Li, T.; Hussain, I.; Wang, J.; Tan, B., Porous hypercrosslinked polymer-TiO<sub>2</sub>-graphene composite photocatalysts for visible-light-driven CO<sub>2</sub> conversion. *Nat. Commun.* **2019**, 10, 1-10.
- (13) Long, R.; Li, Y.; Liu, Y.; Chen, S.; Zheng, X.; Gao, C.; He, C.; Chen, N.; Qi, Z.; Song, L., Isolation of Cu atoms in Pd lattice: forming highly selective sites for photocatalytic conversion of CO<sub>2</sub> to CH<sub>4</sub>. *J. Am. Chem. Soc.* **2017**, 139, 4486-4492.
- (14) Razzaq, A.; Sinhamahapatra, A.; Kang, T.-H.; Grimes, C. A.; Yu, J.-S.; In, S.-I., Efficient solar light photoreduction of CO<sub>2</sub> to hydrocarbon fuels via magnesiothermally reduced TiO<sub>2</sub> photocatalyst. *Appl. Catal., B.* **2017**, 215, 28-35.
- (15) Li, X.; Zhuang, Z.; Li, W.; Pan, H., Photocatalytic reduction of CO<sub>2</sub> over noble metal-loaded and nitrogen-doped mesoporous TiO<sub>2</sub>. *Appl. Catal., A.* **2012**, 429, 31-38.
- (16) Park, S.-M.; Razzaq, A.; Park, Y. H.; Sorcar, S.; Park, Y.; Grimes, C. A.; In, S.-I., Hybrid Cu<sub>x</sub>O-TiO<sub>2</sub> Heterostructured Composites for Photocatalytic CO<sub>2</sub> Reduction into Methane Using Solar Irradiation: Sunlight into Fuel. *ACS Omega.* **2016**, 1, 868-875.
- (17) Xu, J.; Wang, Y.; Zhu, Y., Nanoporous graphitic carbon nitride with enhanced photocatalytic performance. *Langmuir.* **2013**, 29, 10566-10572.
- (18) Dariani, R.; Esmaeili, A.; Mortezaali, A.; Dehghanpour, S., Photocatalytic reaction and degradation of methylene blue on TiO<sub>2</sub> nano-sized particles. *Optik.* **2016**, 127, 7143-7154.
- (19) Chekir, N.; Benhabiles, O.; Tassalit, D.; Laoufi, N. A.; Bentahar, F., Photocatalytic degradation of methylene blue in aqueous suspensions using TiO<sub>2</sub> and ZnO. *Desalin Water Treat.* **2016**, 57, 6141-6147.
- (20) Singh, A.; Khare, P.; Verma, S.; Bhati, A.; Sonker, A. K.; Tripathi, K. M.; Sonkar, S. K., Pollutant Soot for Pollutant Dye Degradation: Soluble Graphene Nanosheets for Visible Light Induced Photodegradation of Methylene Blue. *ACS Sustainable Chem. Eng.* **2017**, 5, 8860-8869.
- (21) Yang, X.; Chen, W.; Huang, J.; Zhou, Y.; Zhu, Y.; Li, C., Rapid degradation of methylene blue in a novel heterogeneous Fe<sub>3</sub>O<sub>4</sub>@rGO@TiO<sub>2</sub>-catalyzed photo-Fenton system. *Sci. Rep.* **2015**, 5, 10632.

- (22) Kazemi, F.; Mohamadnia, Z.; Kaboudin, B.; Karimi, Z., Photodegradation of methylene blue with a titanium dioxide/polyacrylamide photocatalyst under sunlight. *J. Appl. Polym. Sci.* **2016**, 133.
- (23) Jourshabani, M.; Shariatnia, Z.; Badiei, A., In situ fabrication of SnO<sub>2</sub>/S-doped g-C<sub>3</sub>N<sub>4</sub> nanocomposites and improved visible light driven photodegradation of methylene blue. *J. Mol. Liq.* **2017**, 248, 688-702.
- (24) Li, H.; Jing, Y.; Ma, X.; Liu, T.; Yang, L.; Liu, B.; Yin, S.; Wei, Y.; Wang, Y., Construction of a well-dispersed Ag/graphene-like g-C<sub>3</sub>N<sub>4</sub> photocatalyst and enhanced visible light photocatalytic activity. *RSC Adv.* **2017**, 7, 8688-8693.
- (25) Amornpitoksuk, P.; Suwanboon, S.; Sirimahachai, U.; Randorn, C.; Yaemsunthorn, K., Photocatalytic degradation of methylene blue by C<sub>3</sub>N<sub>4</sub>/ZnO: the effect of the melamine/ZnO ratios. *Bull. Mater. Sci.* **2016**, 39, 1507-1513.
- (26) Ashrafi, H., Akhond, M., Absalan, G. Adsorption and photocatalytic degradation of aqueous methylene blue using nanoporous carbon nitride. *J. Photochem. Photobiol., A.* **2020**, 396, 112533.
